# Supplementary material for: Octahedral metal clusters as building units in a neutral layered honeycomb network, [Zn(en)]2[Nb6Cl12(CN)6]
Source: Royal Society of Chemistry journal article supplement (doi:10.1039/b408000a), 2004-01-01
Supplement: b408000a.doc [file b408000a.doc]

Supplementary Data for

Octahedral Metal Clusters as Building Units in a Neutral Layered Honeycomb Network, [Zn(en)]2[Nb6Cl12(CN)6]

Bangbo Yan, Cynthia S. Day, Abdessadek Lachgar

Department of Chemistry, Wake Forest University, Winston-Salem, NC 27109

**Synthesis and characterization for Na4[Nb6Cl12(CN)6]·13H2O** (**1**):5 mL aqueous NaCN (0.510 g, 10.4 mmol) was added to 40 mL methanolic solution of [Nb6Cl12(H2O)4Cl2]·4H2O (0.250 g, 0.208 mmol). After stirring for 6 h, diethyl ether was added. The green precipitate was recrystallized in diethyl ether/MeOH, collected by filtration, and dried under vacuum to get 0.218 g (c.a 85%) of the product. Dark-green octahedral crystals of **1** suitable for single crystal X-ray diffraction were obtained by slow evaporation of asolution (Methanol/water) containing Na4[Nb6Cl12(CN)6]; IR (KBr): **CN 2118 cm1.

**Synthesis and characterization for [Zn(en)]2[(Nb6Cl12)(CN)6] (2):** 10 mL ethanolic solution of Zn(ClO4)2·6H2O (0.186 g, 0.50 mmol) was slowly added to an ethanolic solution (10 mL) of (en) (0.030 g, 0.50 mmol) with stirring. To this solution, 10 mL aqueous solution containing Na4[Nb6Cl12(CN)6]·13H2O (0.123 g, 0.100 mmol)andNaCN (0.264 g, 5.39 mmol) was added. The dark green crystals of **2** obtained after slow evaporation of the solution in air were collected and washed by water and methanol to give 0.045 g (~32%) of the product. Elemental analysis (%): calcd for C10H16Cl12Zn2N10Nb6 (found): C 8.63 (8.18), H 1.15 (1.21), N 10.07 (9.59); IR (KBr): CN 2167 cm1. TG analysis shows that **2** is stable up to 300 °C. The weight loss of 19.2% in the temperature range 300-380 °C could be attributed to the decomposition of en and cyanide groups(calculated 19.85%).

The presence of NaCN is crucial for the crystallization of **1**. Reaction of Zn(ClO4)2·6H2O with **1** in the same condition without en led to the form of compound **1**. Reaction of Zn(ClO4)2·6H2O with Na4[Nb6Cl12(CN)6]·13H2O in the same condition without en and NaCN led to the form of new phase which is not soluble in water and methanol. Trying to crystallize it has not been successful yet.
